# Supplementary material
Source: PubMed Central journal article supplement (PMC4204887)

# Quantification of quaternary structure stability in aggregation-prone proteins under physiological conditions: the transthyretin case

*Lei Z. Robinson and Natàlia Reixach\**

## SUPPLEMENTAL FIGURES

**Supplemental Figure S1:** Subunit exchange reactions between WT TTR and FT<sub>2</sub>.WT TTR and between V122I TTR and FT<sub>2</sub>.V122I TTR over a 48h time course incubation at 37 °C. a) Semi-native PAGE stained with Sypro Ruby (arrowhead points to band 3). b) Quantitation of the FT<sub>2</sub>-homotetramers over time; c) Quantitation of untagged homotetramers over time; d) Quantitation of the heterotetramers composed of 2 FT<sub>2</sub>-subunits and 2 untagged subunits over time. Closed circles, WT/FT<sub>2</sub>.WT reactions; Open squares, V122I/FT<sub>2</sub>.V122I reactions.

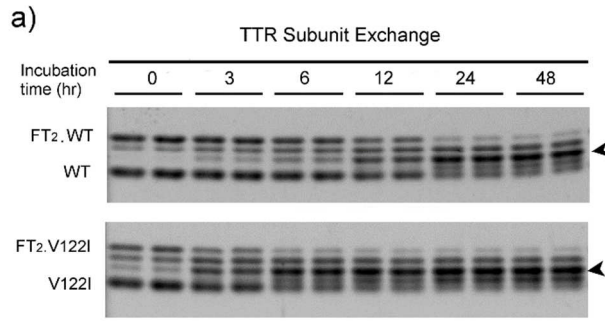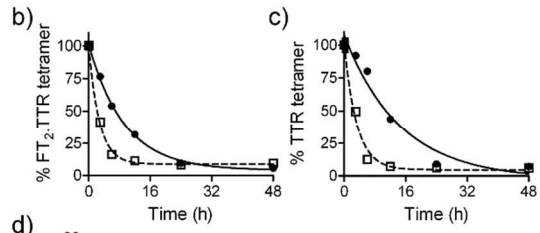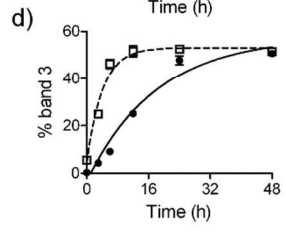

**Supplemental Figure S2:** Stabilization of V122I TTR and FT<sub>2</sub>.V122I TTR by small molecules measured by subunit exchange. V122I TTR and FT<sub>2</sub>.V122I TTR were pre-incubated with SOM0226, tafamidis or DMSO (vehicle control). Mixtures of V122I TTR and FT<sub>2</sub>.V122I TTR with or without small molecules were prepared and incubated for up to 48 h at 37 °C. Subunit exchange rates were measured by quantifying the formation of mixed heterotetramers composed of 2 V122I and 2 FT<sub>2</sub>. V122I subunits (arrowhead points to band 3). a) and c) Asymmetric mode where only V122I TTR was pre-incubated with small molecules; b) and d) Symmetric mode where both V122I and FT<sub>2</sub>. V122I TTR were pre-incubated with small molecules. Symbols: DMSO, open diamonds; SOM0226, open circles; tafamidis, open triangles.

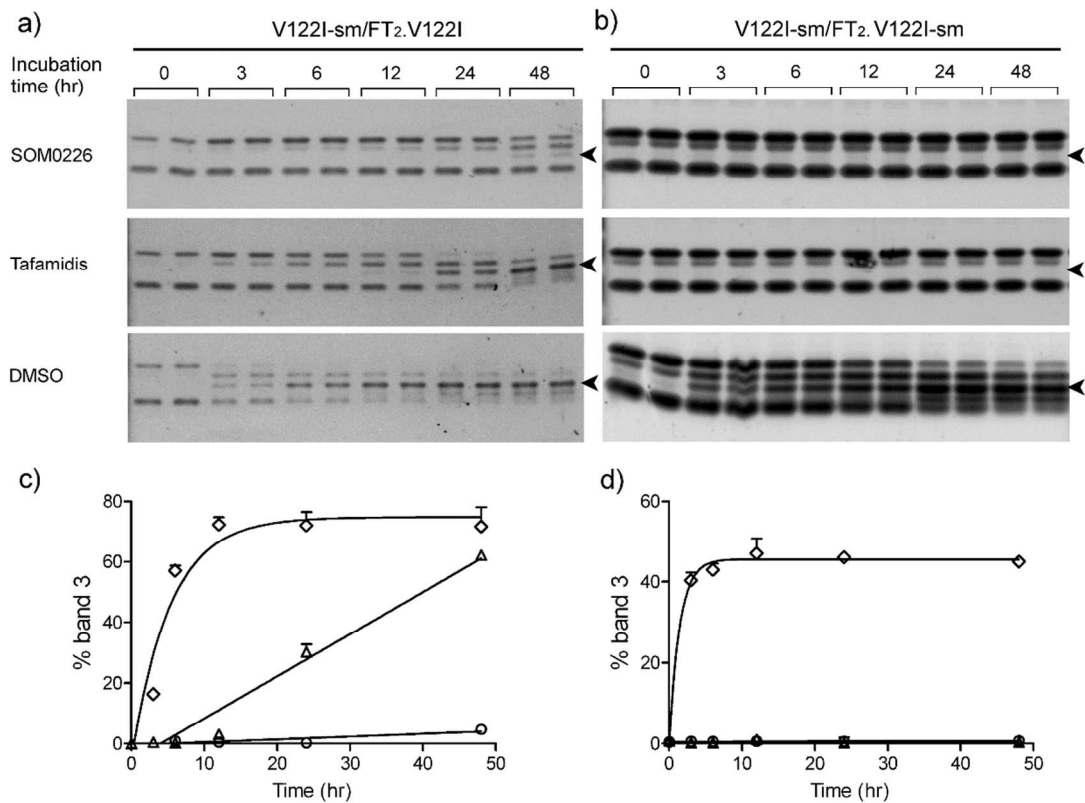

Supplement: bi500739q_si_001.pdf [file bi500739q_si_001.pdf]
